# Supplementary material for: Volcanic Clouds Characterization of the 2020–2022 Sequence of Mt. Etna Lava Fountains Using MSG-SEVIRI and Products’ Cross-Comparison
Source: MDPI journal article supplement (doi:10.3390/rs15082055), 2023-04-13
Supplement: s1 [file s1]

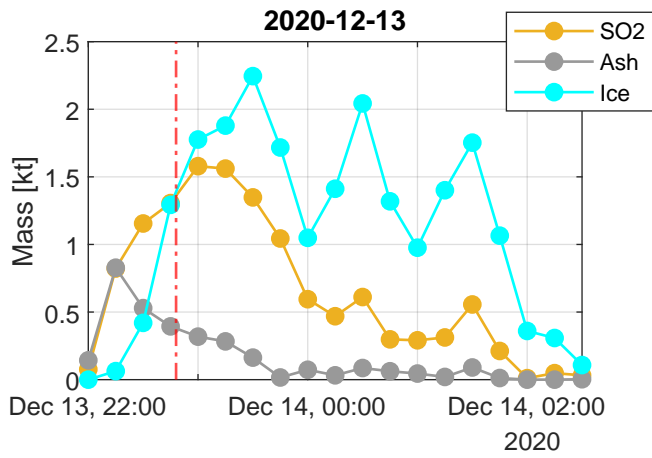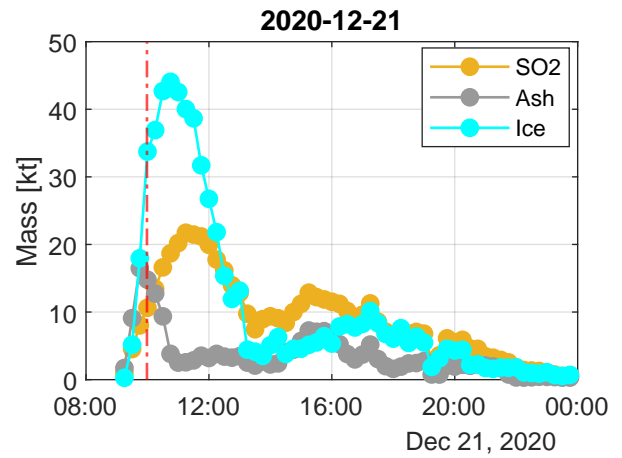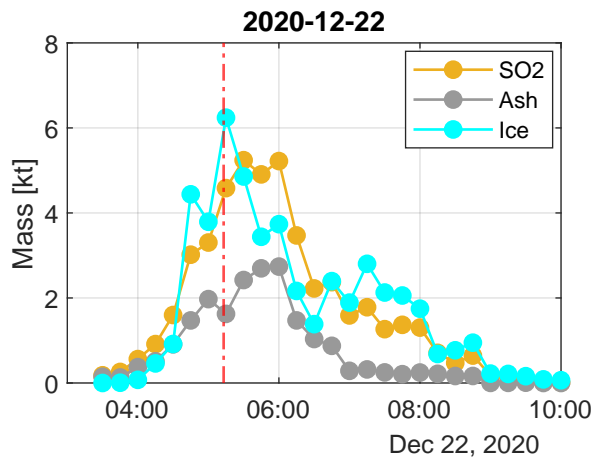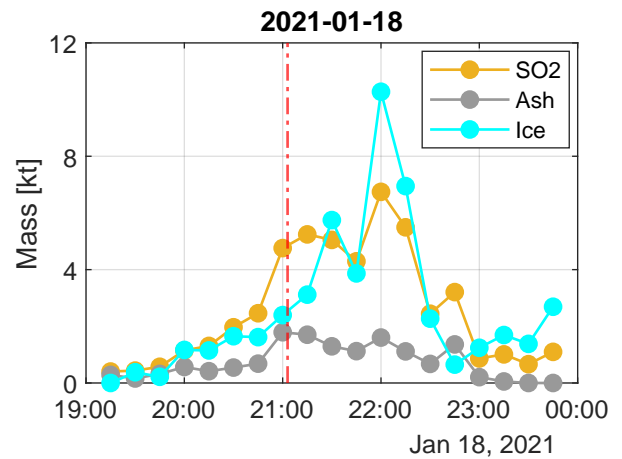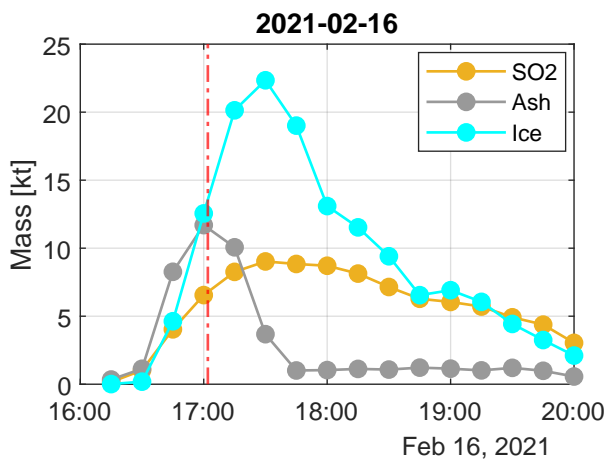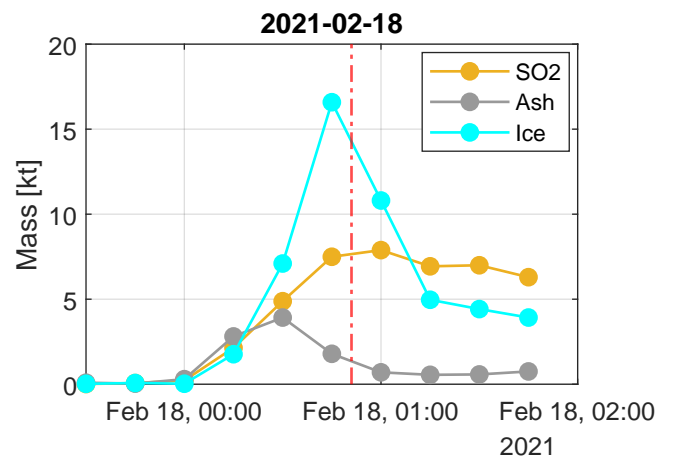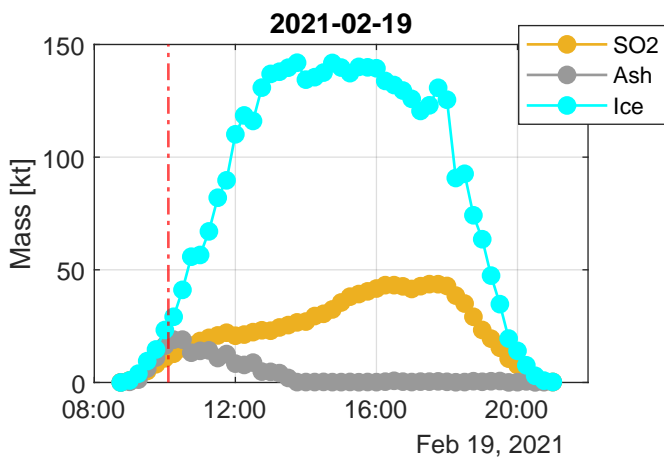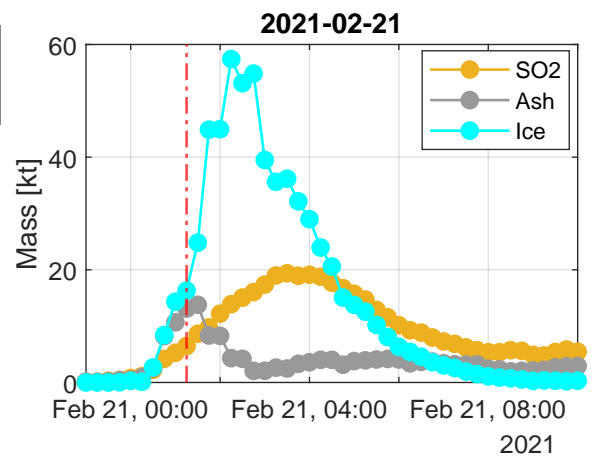

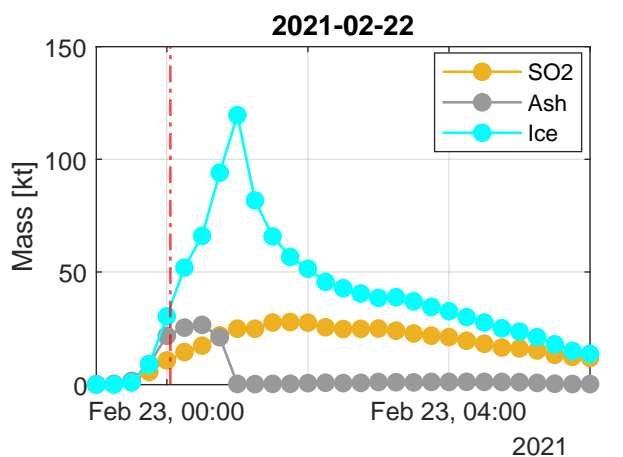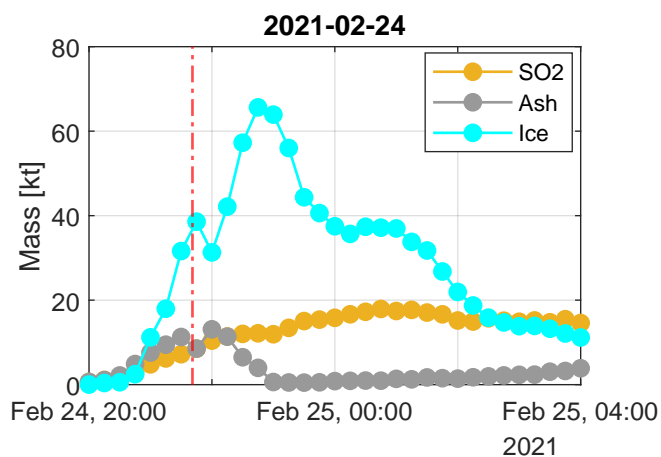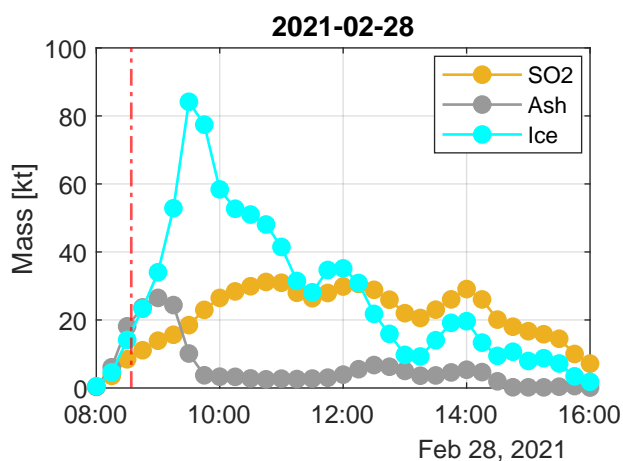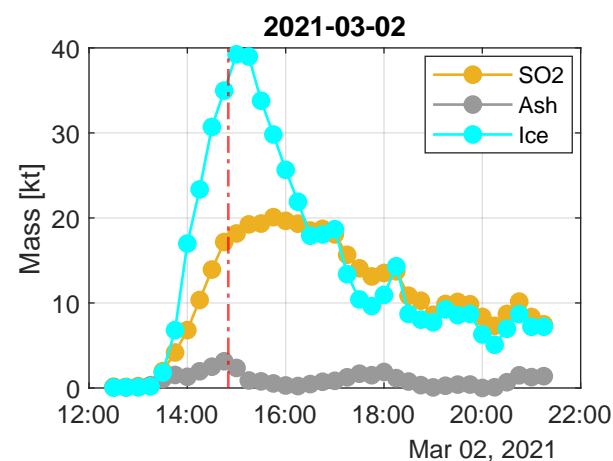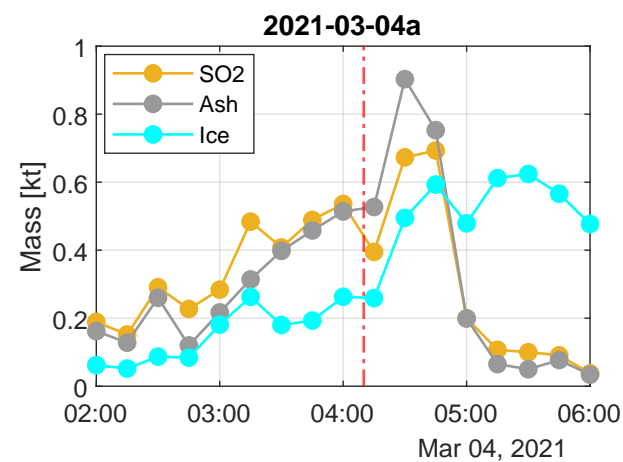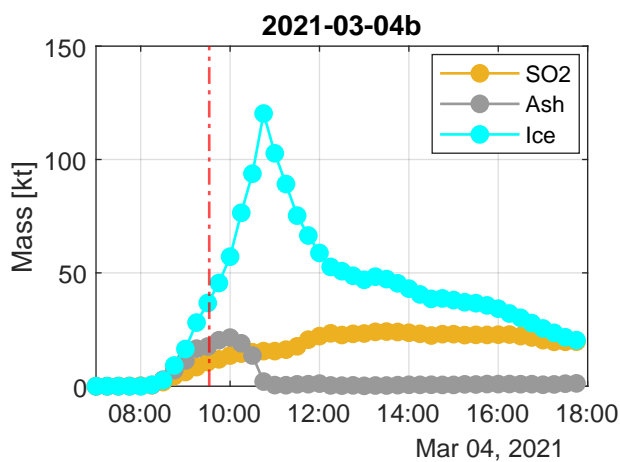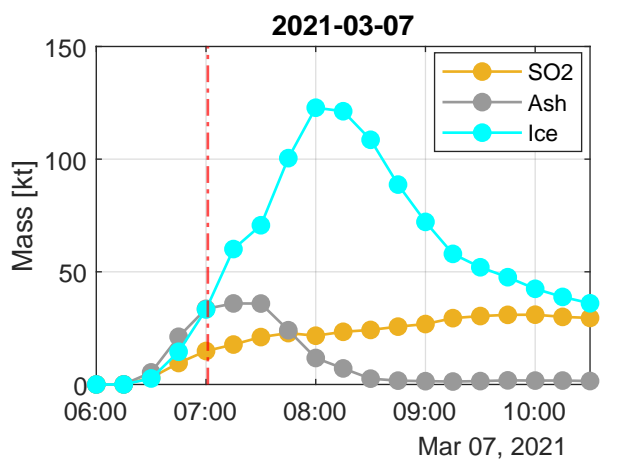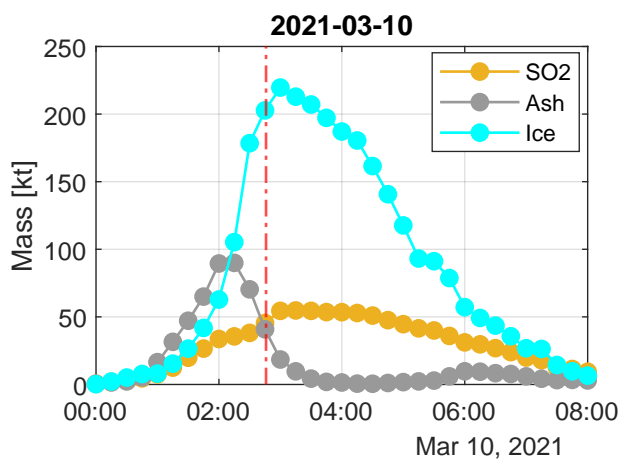

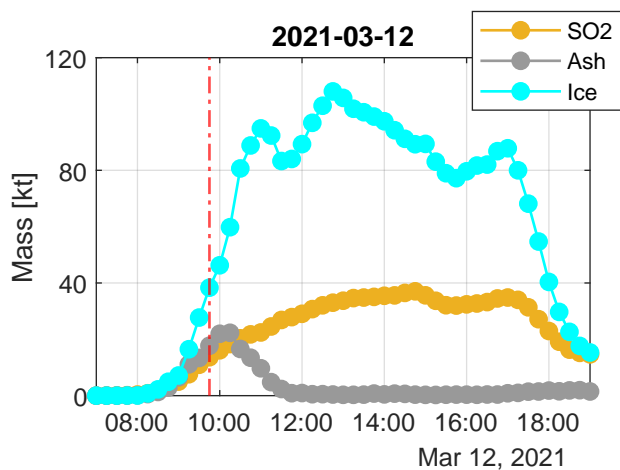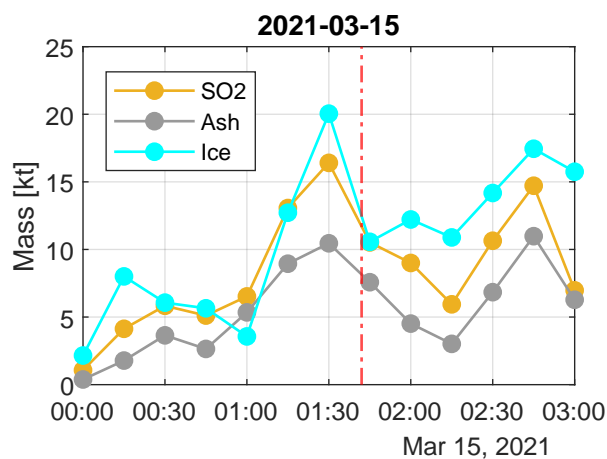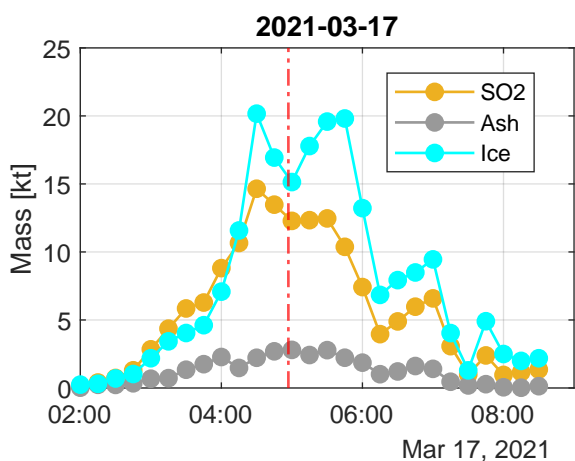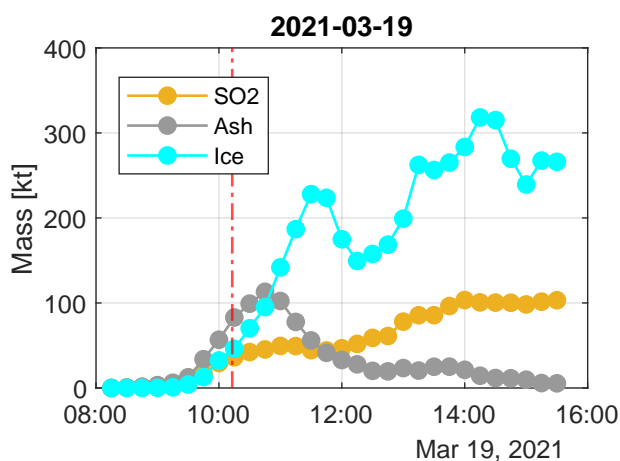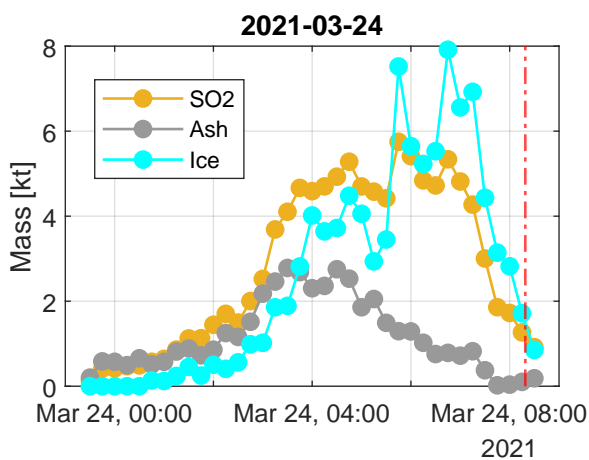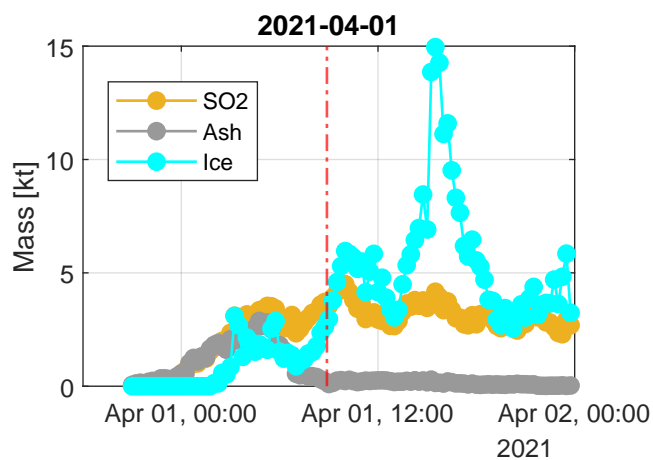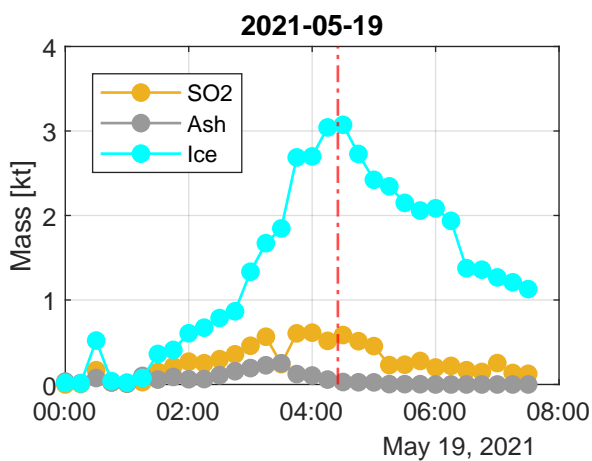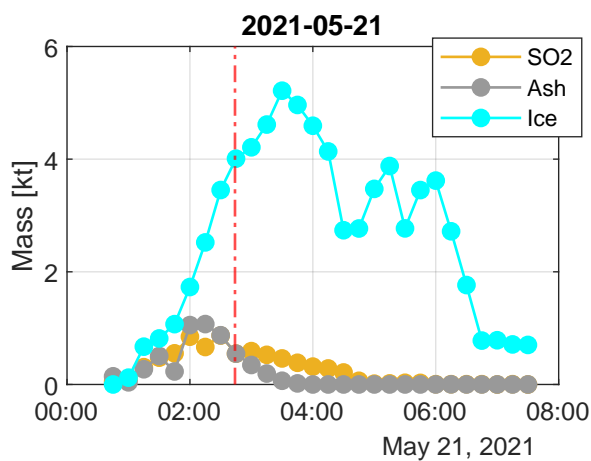

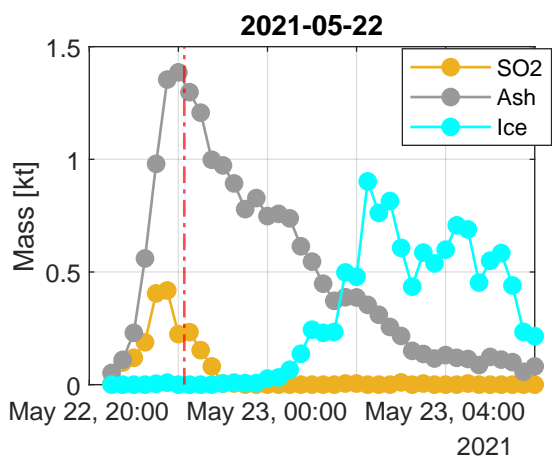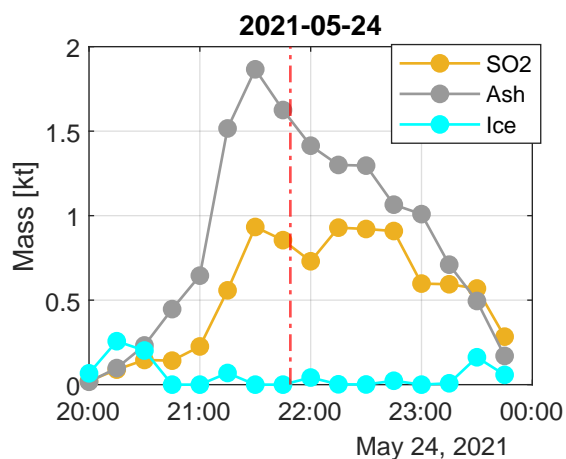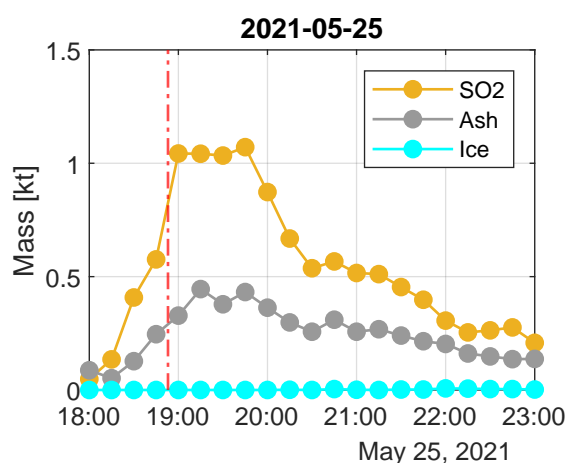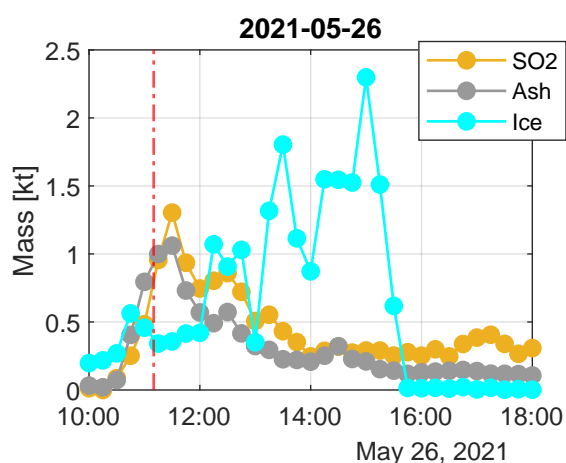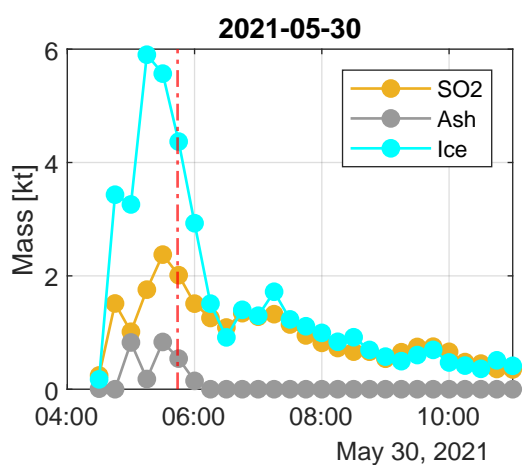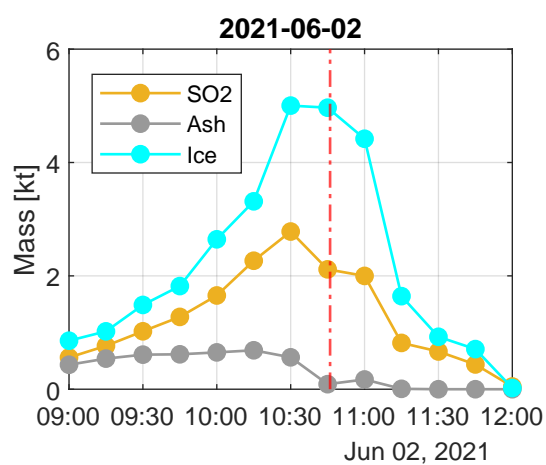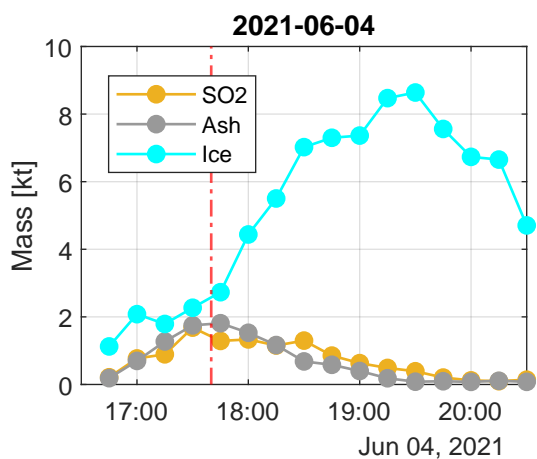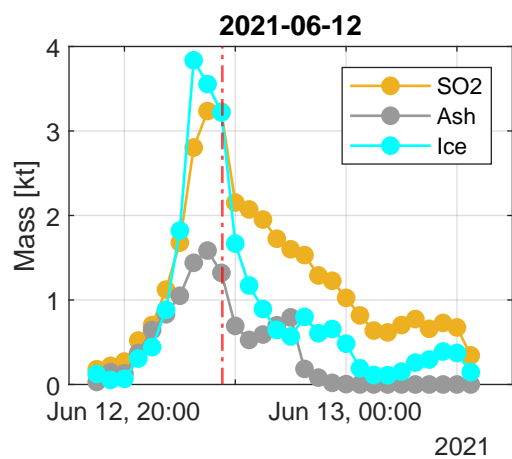

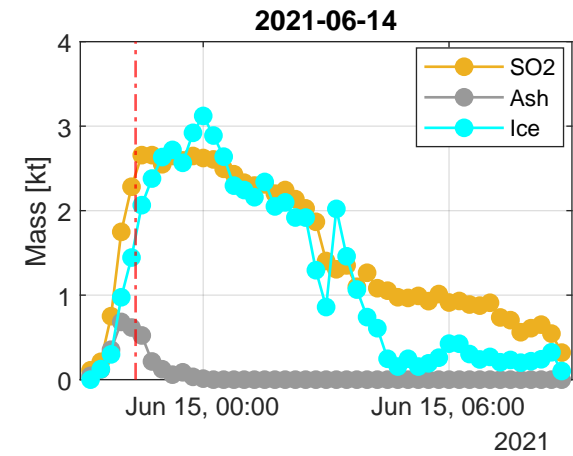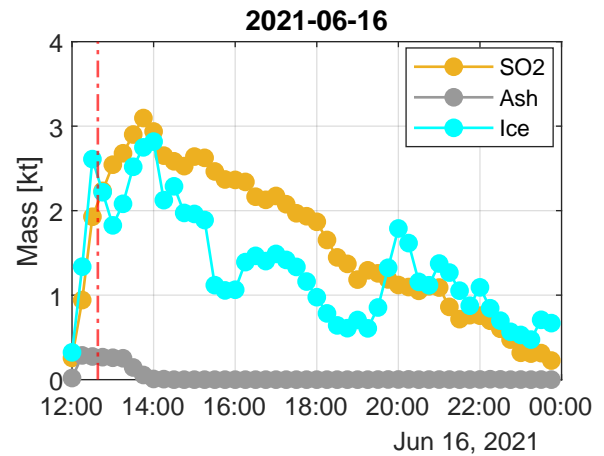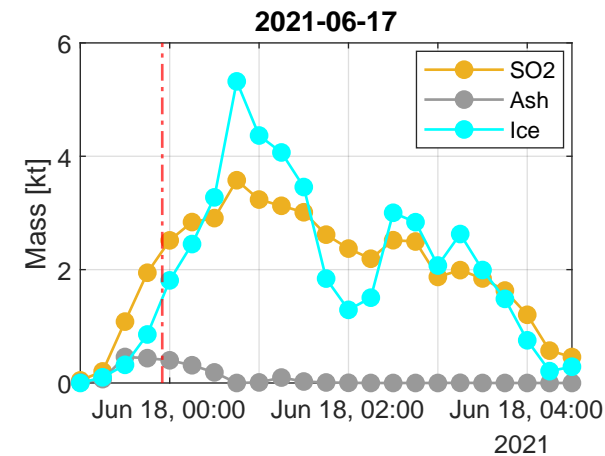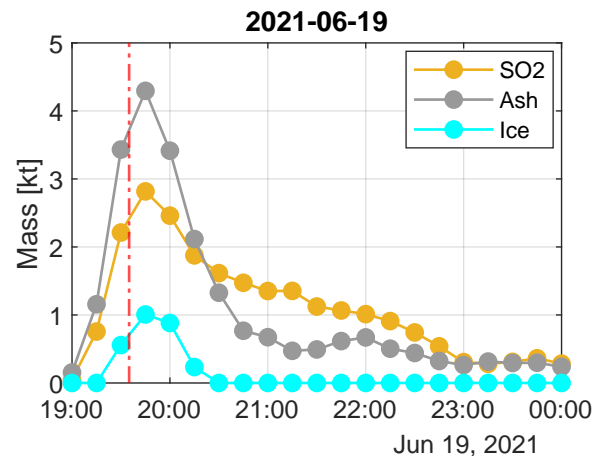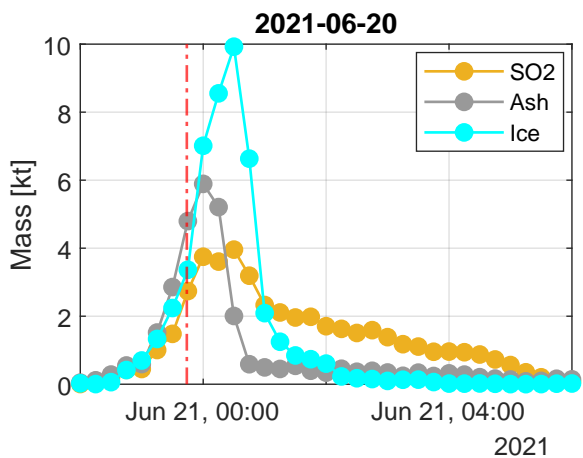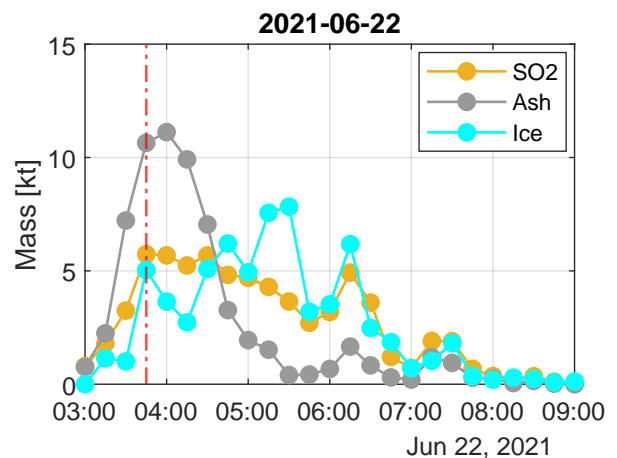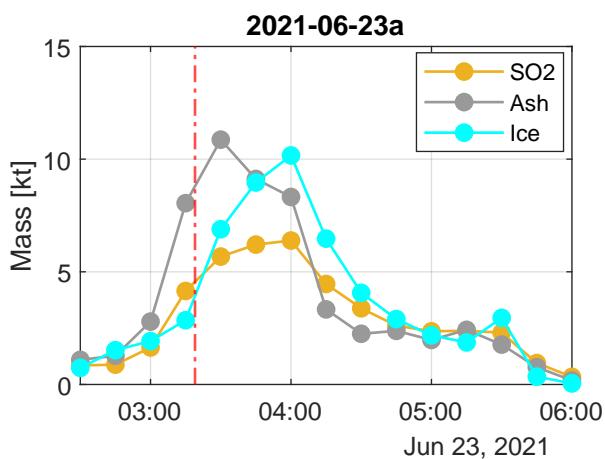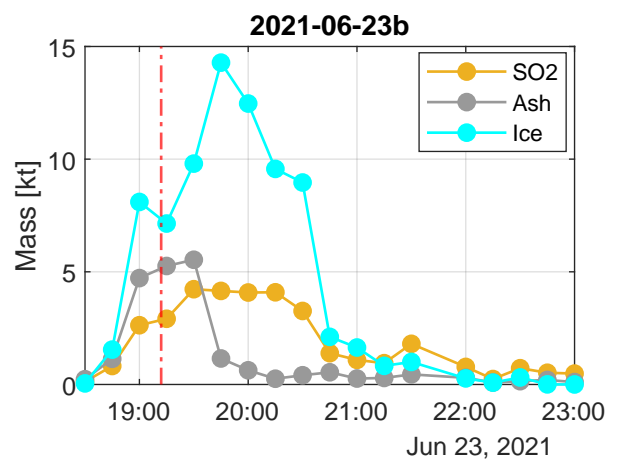

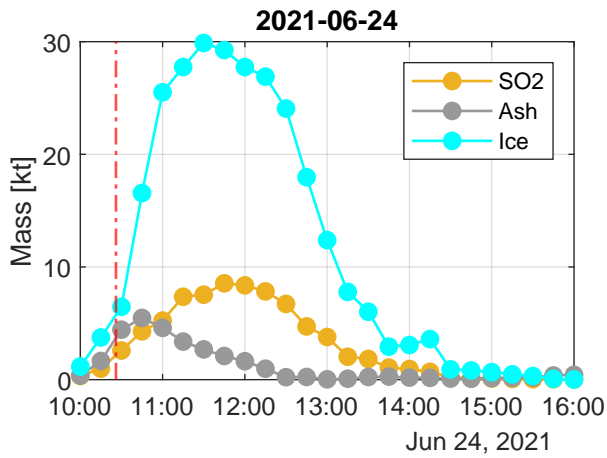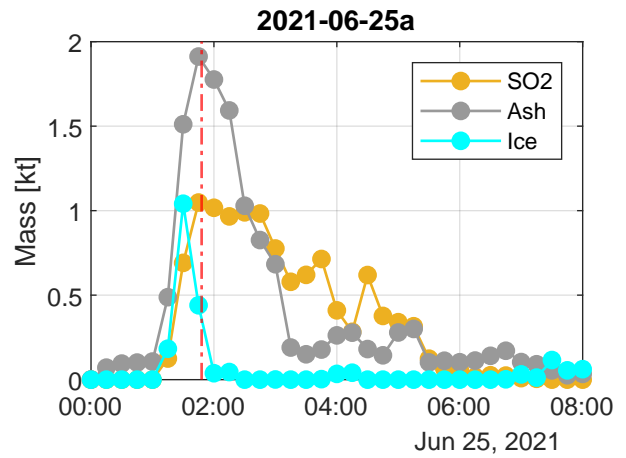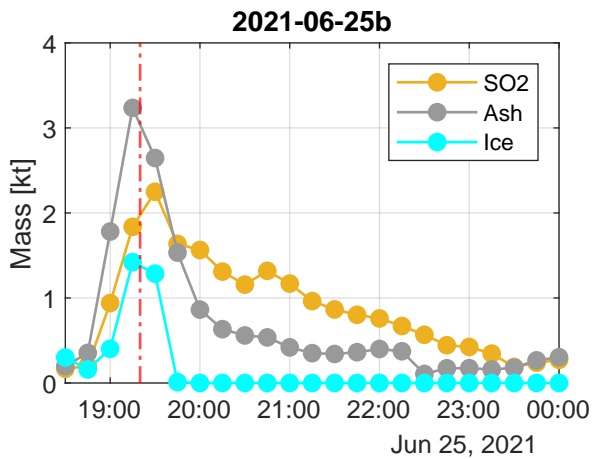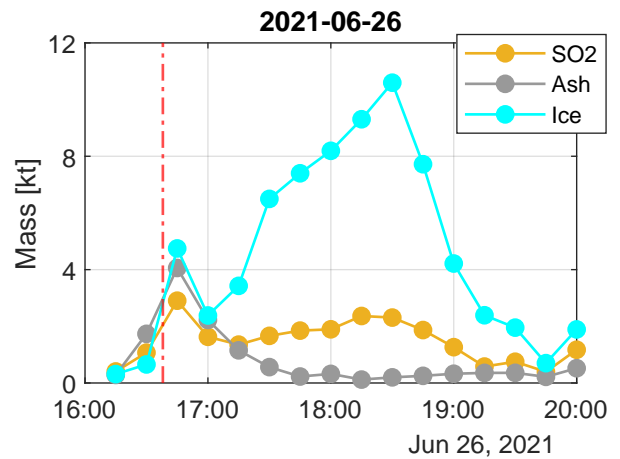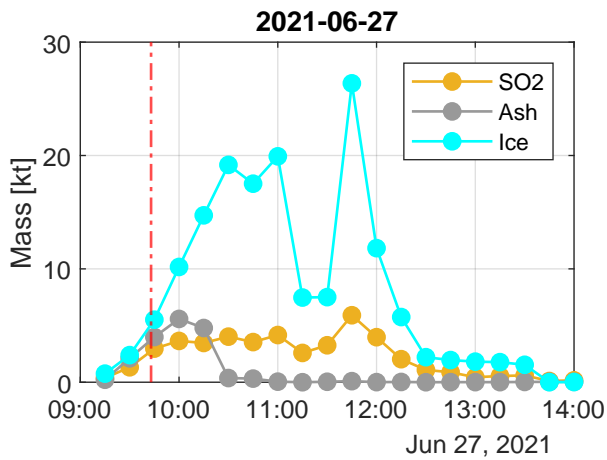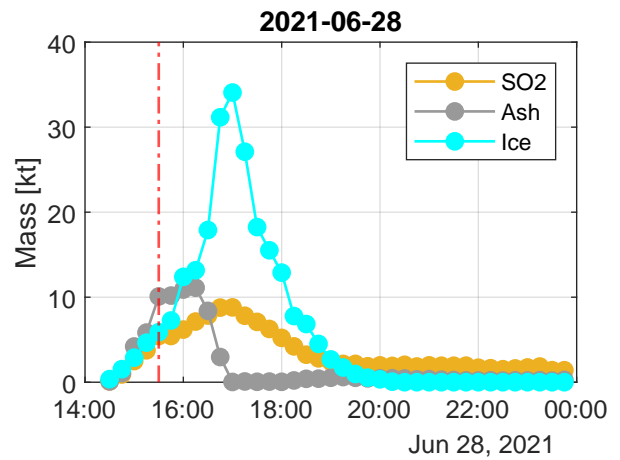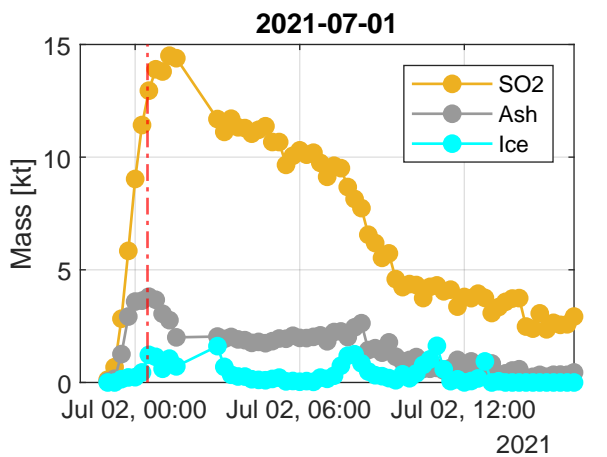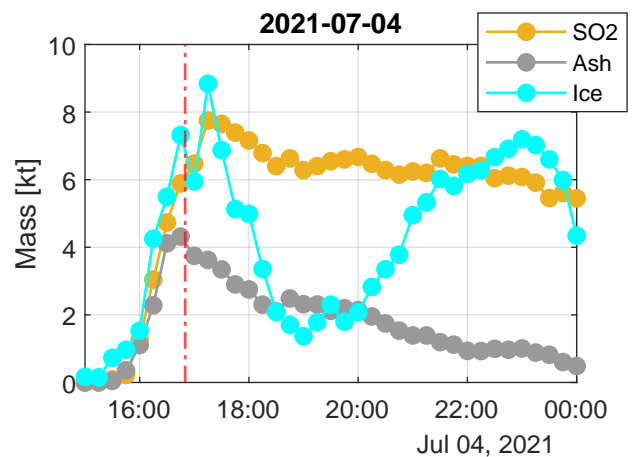

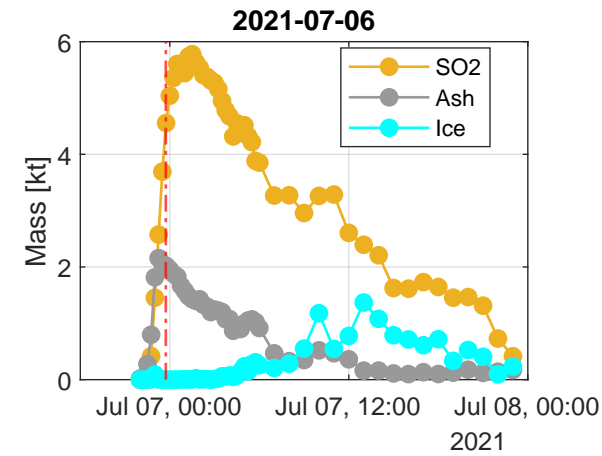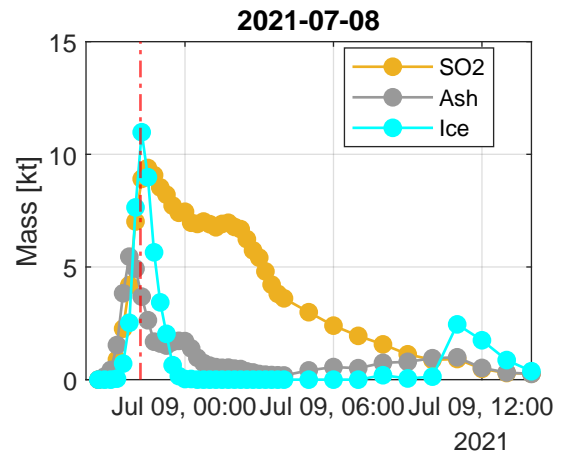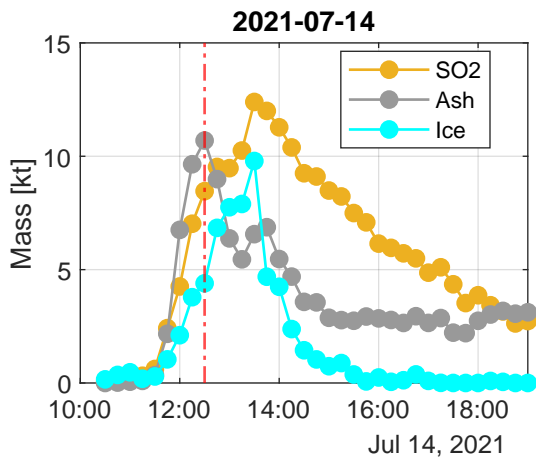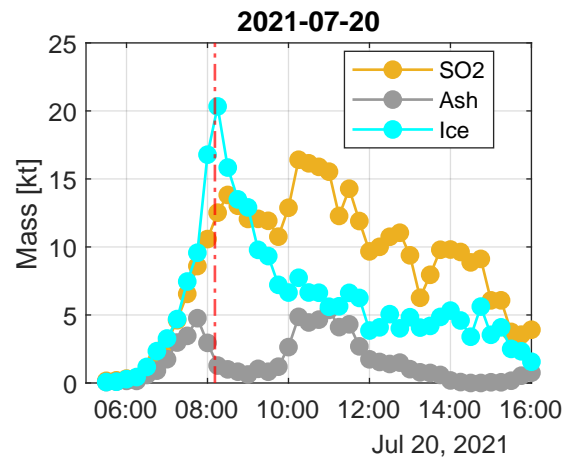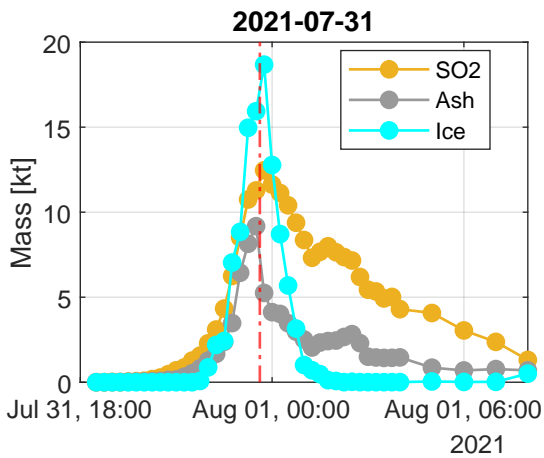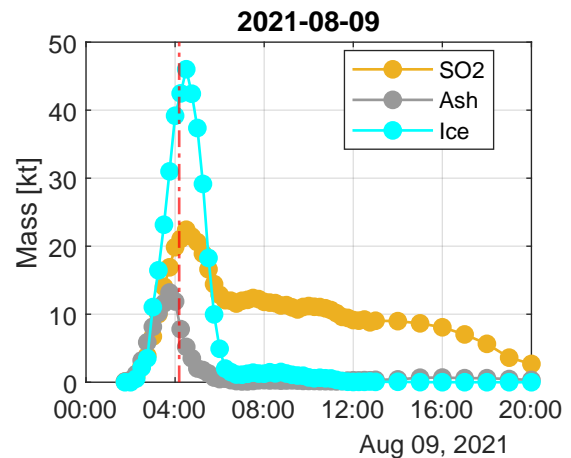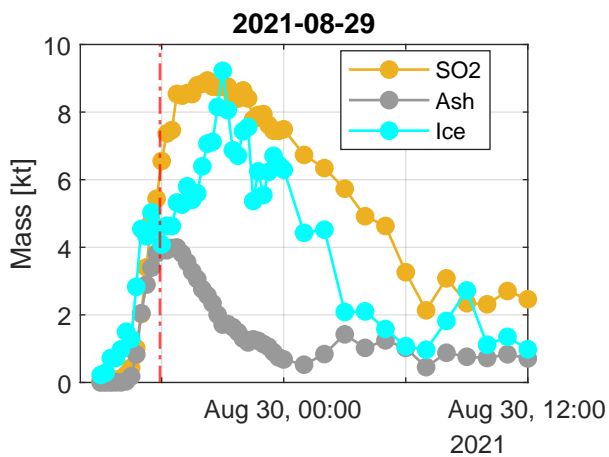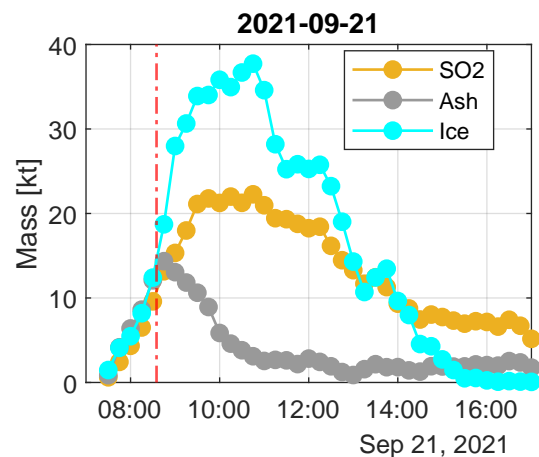

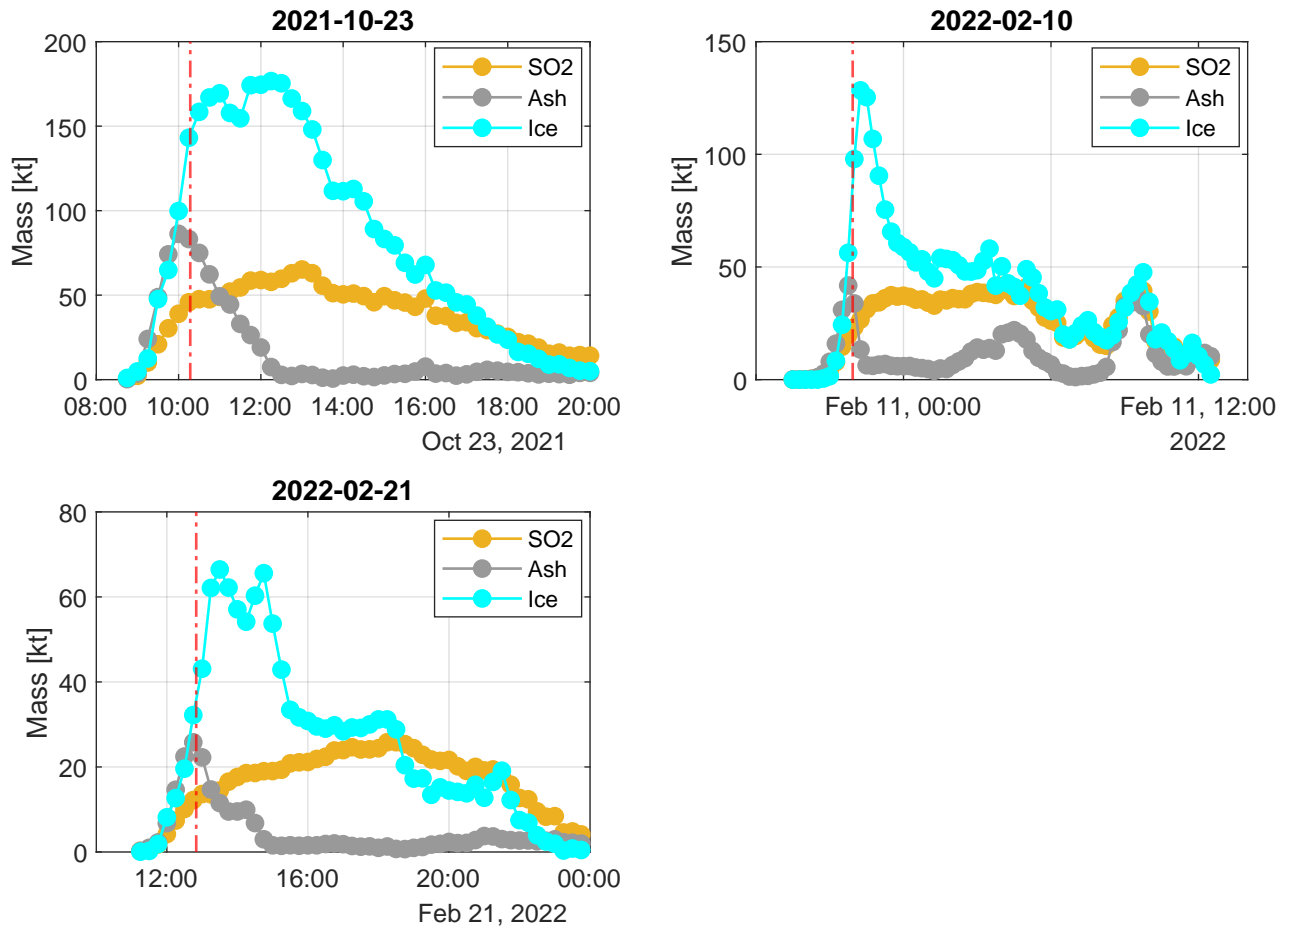

Figure S1: The complete ash/ice/SO<sub>2</sub> time series plots for all the 2020-2022 Etna Lava Fountains using VPR procedure.
